# Supplementary material
Source: PubMed Central journal article supplement (PMC4163512)
Supplement: NIHMS618018-supplement-01.pdf [file NIHMS618018-supplement-01.pdf]

Table S1

Genetic enhancement/suppression of the *in fy* polarity phenotype.

| Gal4                           | UAS-in         | UAS-fy                            | other                           | # wings | Mean polarity Score Ventral <sup>^</sup> (sd) | P*=    | Mean polarity Score Dorsal <sup>#</sup> (sd) | P*=    |
|--------------------------------|----------------|-----------------------------------|---------------------------------|---------|-----------------------------------------------|--------|----------------------------------------------|--------|
| <i>ptc -1</i> <sup>&amp;</sup> | <i>HA-in-1</i> | <i>fy-GFP -1</i>                  |                                 | 68      | 2.98 (0.12)                                   | NR     | 2.06 (0.29)                                  | NR     |
| <i>ptc -2</i>                  | <i>HA-in-1</i> | <i>fy-GFP -1</i>                  |                                 | 7       | 3 (0)                                         | 0.95   | 2.57 (0.53)                                  | <0.001 |
| <i>ptc -1, Tub-1</i>           | <i>HA-in-1</i> | <i>fy-GFP -1</i>                  |                                 | 15      | 3 (0)                                         | 0.94   | 2.67 (0.49)                                  | <0.001 |
| <i>ptc -1</i>                  | <i>HA-in-2</i> | <i>fy-GFP -1</i>                  |                                 | 39      | 3 (0)                                         | 0.90   | 2.87 (0.34)                                  | <0.001 |
| <i>ptc -1</i>                  | <i>HA-in-2</i> | <i>fy-GFP -2</i>                  |                                 | 22      | 3 (0)                                         | 0.92   | 3 (0)                                        | <0.001 |
| <i>ptc -1</i>                  | <i>HA-in-2</i> | <i>fy-GFP -1, fy-flag-ollas-1</i> |                                 | 20      | 3(0)                                          | 0.92   | 2.70 (0.47)                                  | <0.001 |
| <i>ptc -1</i>                  | <i>HA-in-1</i> | <i>fy-GFP -2</i>                  |                                 | 20      | 2 (0.45)                                      | <0.001 | 1.58 (0.51)                                  | 0.003  |
| <i>ptc -1</i>                  | <i>HA-in-1</i> | <i>fy-GFP -1, fy-flag-ollas</i>   |                                 | 33      | 2.52 (0.66)                                   | 0.002  | 1.66 (0.55)                                  | 0.003  |
| <i>ptc -1</i>                  | <i>HA-in-1</i> |                                   |                                 | 10      | 1 (0)                                         | <0.001 | 1.0 (0)                                      | <0.001 |
| <i>ptc -1</i>                  |                | <i>fy-GFP -1</i>                  |                                 | 15      | 1 (0)                                         | <0.001 | 1.0 (0)                                      | <0.001 |
| <i>ptc -1</i>                  | <i>HA-in-1</i> | <i>fy-GFP -1</i>                  | <i>pk-1/+</i>                   | 20      | 3 (0)                                         | 0.92   | 2.95 (0.22)                                  | <0.001 |
| <i>ptc -1</i>                  | <i>HA-in-1</i> | <i>fy-GFP -1</i>                  | <i>pk<sup>pk-sple13</sup>/+</i> | 13      | 3 (0)                                         | 0.94   | 3 (0)                                        | <0.001 |
| <i>ptc -1</i>                  | <i>HA-in-1</i> | <i>fy-GFP -1</i>                  | <i>Vang<sup>A5</sup>/+</i>      | 15      | 2.93 (0.26)                                   | 0.76   | 2.93 (0.26)                                  | <0.001 |
| <i>ptc -1</i>                  | <i>HA-in-1</i> | <i>fy-GFP -1</i>                  | <i>fz<sup>P21</sup>/+</i>       | 28      | 2.93 (0.26)                                   | 0.67   | 2.18 (0.40)                                  | 0.35   |
| <i>ptc -1</i>                  | <i>HA-in-1</i> | <i>fy-GFP -1</i>                  | <i>fz<sup>K21</sup>/+</i>       | 19      | 2.75 (0.44)                                   | 0.11   | 2 (0)                                        | 0.70   |
| <i>ptc -1</i>                  | <i>HA-in-1</i> | <i>fy-GFP -1</i>                  | <i>stan<sup>3-71</sup>/+</i>    | 23      | 2.91 (0.29)                                   | 0.61   | 2.05 (0.21)                                  | 0.93   |
| <i>ptc -1</i>                  | <i>HA-in-1</i> | <i>fy-GFP -1</i>                  | <i>dsh<sup>1</sup>/+</i>        | 16      | 2.88 (0.34)                                   | 0.50   | 2 (0)                                        | 0.662  |
| <i>ptc -1</i>                  | <i>HA-in-1</i> | <i>fy-GFP -1</i>                  | <i>fy<sup>1</sup>/+</i>         | 36      | 2.43 (0.50)                                   | <0.001 | 1.86 (0.55)                                  | 0.123  |
| <i>ptc -1</i>                  | <i>HA-in-1</i> | <i>fy-GFP -1</i>                  | <i>frtz<sup>3521</sup>/+</i>    | 44      | 2.43 (0.50)                                   | <0.001 | 1.74 (0.44)                                  | 0.009  |
| <i>ptc -1</i>                  | <i>HA-in-1</i> | <i>fy-GFP -1</i>                  | <i>in<sup>1</sup>/+</i>         | 26      | 2.92 (0.60)                                   | 0.49   | 2 (0.47)                                     | 0.69   |
| <i>ptc -1</i>                  | <i>HA-in-1</i> | <i>fy-GFP -1</i>                  | <i>arm-fz-GFP/+</i>             | 13      | 3 (0)                                         | 0.94   | 1.84 (0.38)                                  | 0.25   |
| <i>ptc -1</i>                  | <i>HA-in-1</i> | <i>fy-GFP -1</i>                  | <i>Cas-dsh-GFP/+</i>            | 23      | 2.91 (0.29)                                   | 0.61   | 1.46 (0.59)                                  | <0.001 |
| <i>ptc -1</i>                  | <i>HA-in-1</i> | <i>fy-GFP -1</i>                  | <i>Ubi-myc-frtz-GFP</i>         | 39      | 2.98 (0.72)                                   | 0.93   | 2.44 (0.53)                                  | 0.066  |

&amp;=number of copies, \* Mann-Whitney rank sum test, ^ 1=0-30°, 2=30°-90°, 3&gt;90°, # 1=0-30°, 2=30°-60°, 3&gt;60°
