# Supplementary material
Source: PubMed Central journal article supplement (PMC4163512)
Supplement: NIHMS618018-supplement-02.pdf [file NIHMS618018-supplement-02.pdf]

Table S2

Genetic enhancement/suppression of the *in fy* multiple hair cell phenotype.

| Gal4                 | UAS-in         | UAS-fy                                      | other                         | Mean # mhc   | Number of wings | p <sup>&amp;</sup> = |
|----------------------|----------------|---------------------------------------------|-------------------------------|--------------|-----------------|----------------------|
| <i>ptc -1*</i>       | <i>HA-in-1</i> | <i>fy-GFP -1</i>                            |                               | 4.16 (3.0)   | 55              | NR                   |
| <i>ptc -2</i>        | <i>HA-in-1</i> | <i>fy-GFP -1</i>                            |                               | 18.33 (8.2)  | 6               | <0.001               |
| <i>ptc -1, Tub-1</i> | <i>HA-in-1</i> | <i>fy-GFP -1</i>                            |                               | 25.60 (7.3)  | 15              | <0.001               |
| <i>ptc -1</i>        | <i>HA-in-2</i> | <i>fy-GFP -1</i>                            |                               | 42.51 (18.2) | 37              | <0.001               |
| <i>ptc -1</i>        | <i>HA-in-2</i> | <i>fy-GFP -2</i>                            |                               | 72.18 (12.5) | 22              | <0.001               |
| <i>ptc -1</i>        | <i>HA-in-2</i> | <i>fy-GFP -1,</i><br><i>fy-flag-ollas-1</i> |                               | 25.2 (5.7)   | 19              | <0.001               |
| <i>ptc -1</i>        | <i>HA-in-1</i> | <i>fy-GFP -2</i>                            |                               | 2.80 (2.2)   | 15              | =0.10                |
| <i>ptc -1</i>        | <i>HA-in-1</i> | <i>fy-GFP -1,</i><br><i>fy-flag-ollas</i>   |                               | 0.32 (0.55)  | 28              | <0.001               |
| <i>ptc -1</i>        | <i>HA-in-1</i> |                                             |                               | 0 (0)        | 10              | <0.001               |
| <i>ptc -1</i>        |                | <i>fy-GFP -1</i>                            |                               | 0 (0)        | 15              | <0.001               |
| <i>ptc -1</i>        | <i>HA-in-1</i> | <i>fy-GFP -1</i>                            | <i>pk-1/+</i>                 | 53.71 (21.6) | 14              | <0.001               |
| <i>ptc -1</i>        | <i>HA-in-1</i> | <i>fy-GFP -1</i>                            | <i>pk<sup>pk-sple</sup>/+</i> | 7.60 (4.6)   | 15              | =0.01                |
| <i>ptc -1</i>        | <i>HA-in-1</i> | <i>fy-GFP -1</i>                            | <i>Vang<sup>A5</sup>/+</i>    | 29.55 (17.1) | 11              | <0.001               |
| <i>ptc -1</i>        | <i>HA-in-1</i> | <i>fy-GFP -1</i>                            | <i>fz<sup>p21</sup>/+</i>     | 11.24 (5.9)  | 38              | <0.001               |
| <i>ptc -1</i>        | <i>HA-in-1</i> | <i>fy-GFP -1</i>                            | <i>fz<sup>k21</sup>/+</i>     | 17.59 (7.94) | 17              | <0.001               |
| <i>ptc -1</i>        | <i>HA-in-1</i> | <i>fy-GFP -1</i>                            | <i>stan<sup>3-71</sup>/+</i>  | 12.29 (4.6)  | 24              | <0.001               |
| <i>ptc -1</i>        | <i>HA-in-1</i> | <i>fy-GFP -1</i>                            | <i>dsh<sup>1</sup>/+</i>      | 11.13 (7.4)  | 15              | <0.001               |
| <i>ptc -1</i>        | <i>HA-in-1</i> | <i>fy-GFP -1</i>                            | <i>fy<sup>1</sup>/+</i>       | 4.00 (2.1)   | 22              | =0.92                |
| <i>ptc -1</i>        | <i>HA-in-1</i> | <i>fy-GFP -1</i>                            | <i>fy<sup>2</sup>/+</i>       | 4.17 (3.6)   | 18              | =0.81                |
| <i>ptc -1</i>        | <i>HA-in-1</i> | <i>fy-GFP -1</i>                            | <i>frtz<sup>3521</sup>/+</i>  | 2.65 (2.2)   | 48              | =0.01                |
| <i>ptc -1</i>        | <i>HA-in-1</i> | <i>fy-GFP -1</i>                            | <i>in<sup>1</sup>/+</i>       | 4.11 (3.3)   | 27              | =0.79                |
| <i>ptc -1</i>        | <i>HA-in-1</i> | <i>fy-GFP -1</i>                            | <i>arm-fz-GFP/+</i>           | 5.76 (4.5)   | 17              | =0.277               |
| <i>ptc -1</i>        | <i>HA-in-1</i> | <i>fy-GFP -1</i>                            | <i>Cas-dsh-GFP</i>            | 2.01 (1.5)   | 20              | =0.004               |
| <i>ptc -1</i>        | <i>HA-in-1</i> | <i>fy-GFP -1</i>                            | <i>Ubi-myc-frtz-GFP</i>       | 5.30 (5.3)   | 10              | =0.70                |

\*=number of copies

&= t-test comparison to *ptc-GAL4 UAS-HA-in UAS-fy-GFP/+*
